# Supplementary material for: Tipping points in ocean and atmosphere circulations
Source: Copernicus journal article supplement (doi:10.5194/esd-16-1611-2025), 2025-10-08
Supplement: Supplementary file 1 [file esd-16-1611-2025-supplement.pdf]

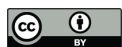

*Supplement of*

## **Tipping points in ocean and atmosphere circulations**

**Sina Loriani et al.**

*Correspondence to:* Sina Loriani ([sina.loriani@pik-potsdam.de](mailto:sina.loriani@pik-potsdam.de))

The copyright of individual parts of the supplement might differ from the article licence.

**A** MLD in Winter 2020-30

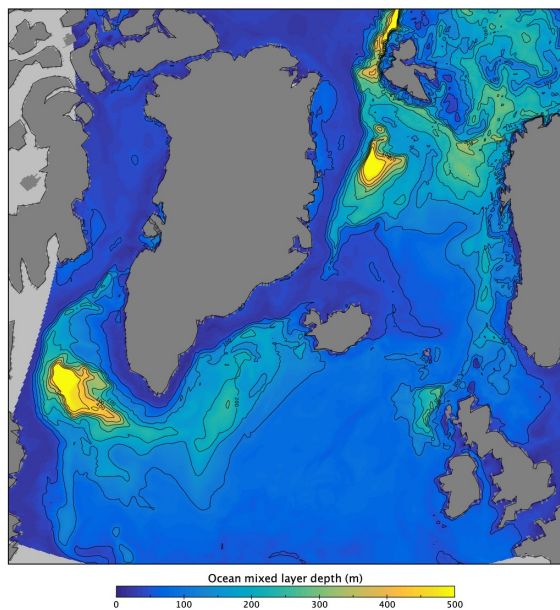

**B** Projected MLD change by winter 2040-50

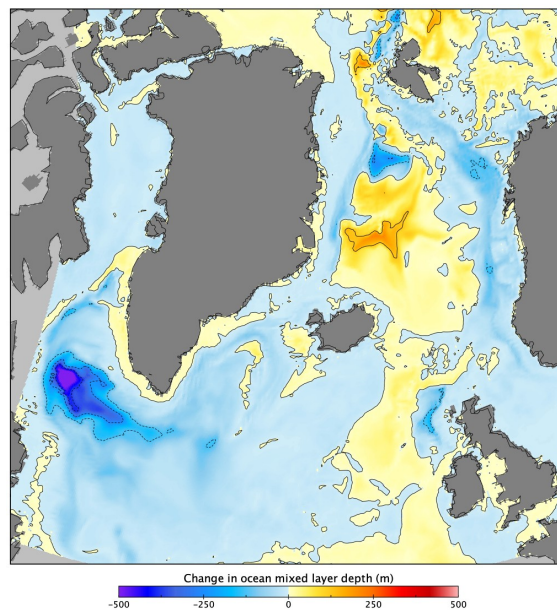

**C** SST in winter 2020-30

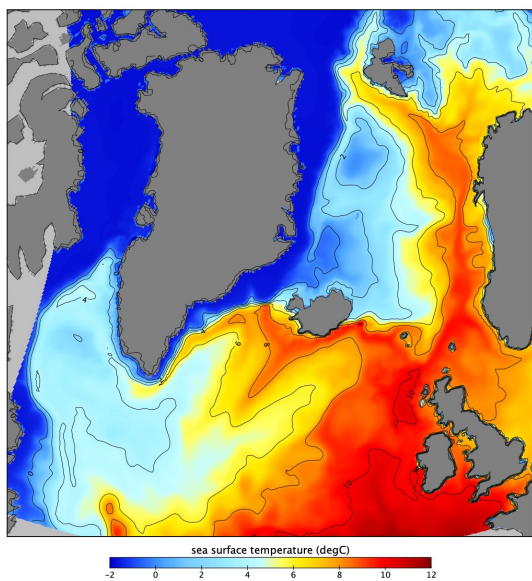

**D** projected SST change by winter 2040-50

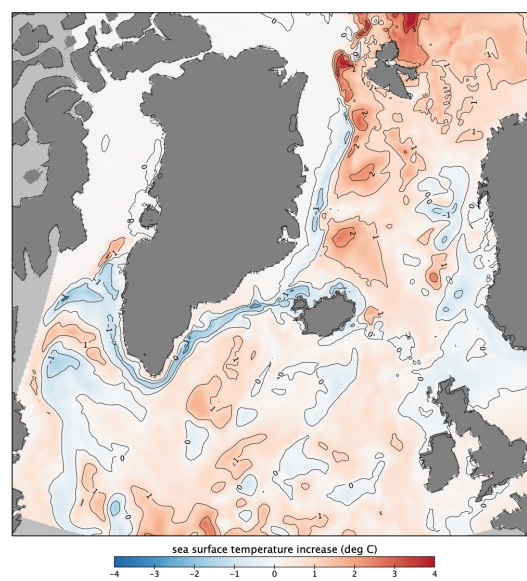

**E** SST in summer 2020-30

**F** Projected SST change by summer 2040-50

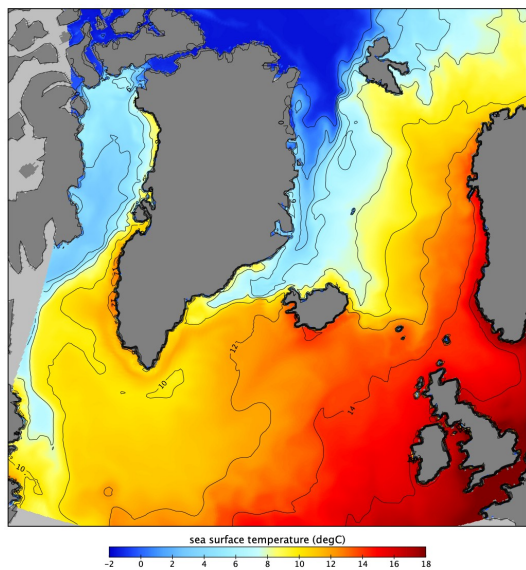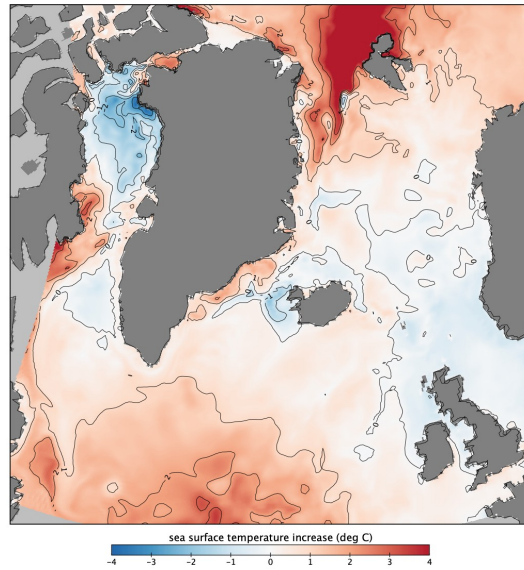

**G** Precipitation in winter 2020-30

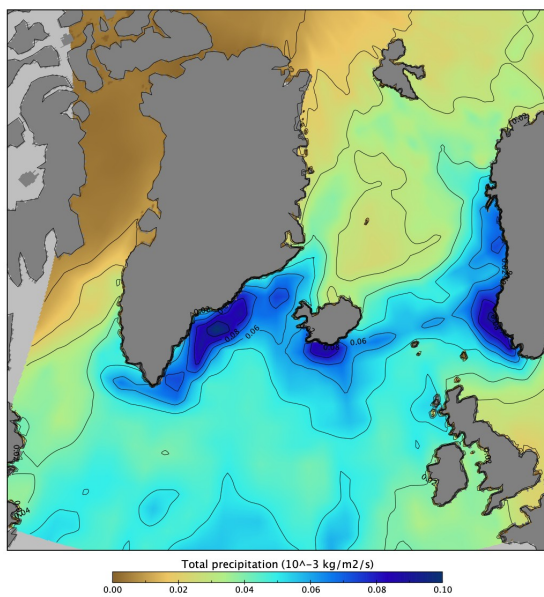

**H** Projected precipitation change by winter 2040-50

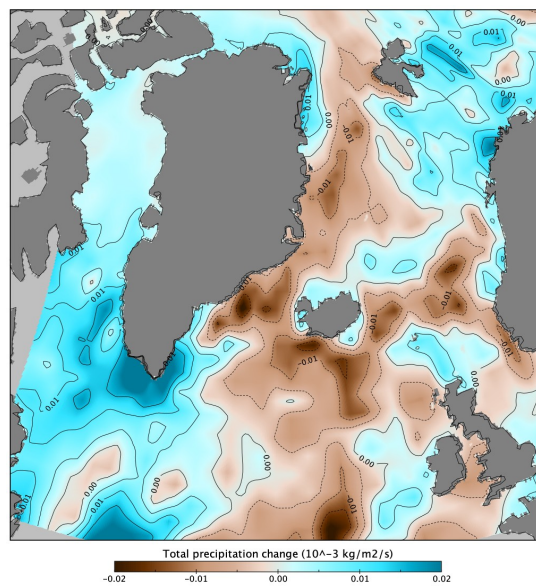

**I** Precipitation in summer 2020-30

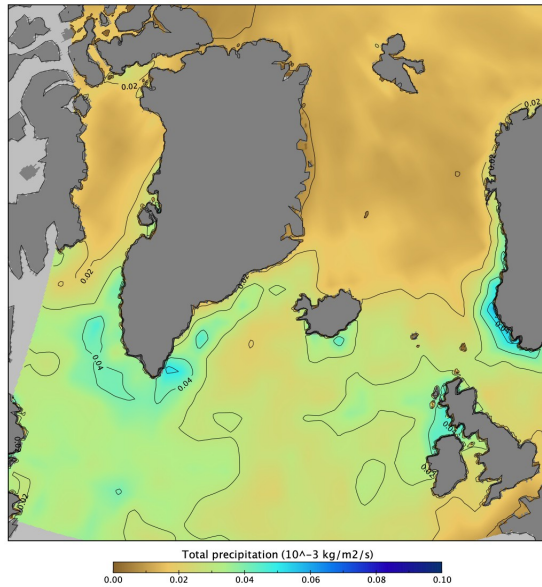

**J** Projected precipitation change by summer 2040-50

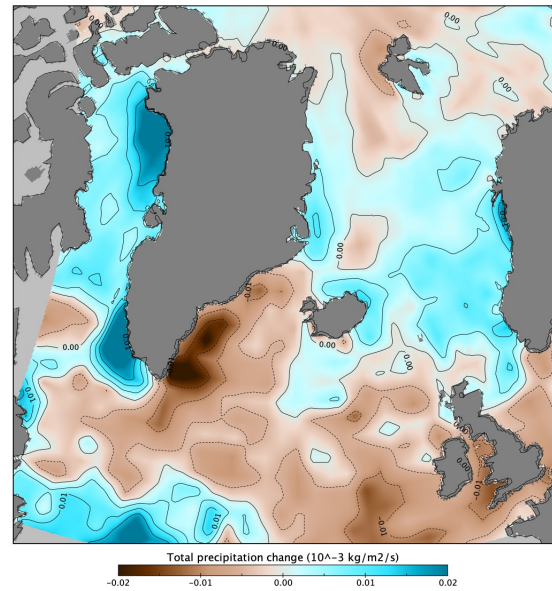

**Figure S1. Additional analysis of SPG. A** in winter 2020-30 (January-March) and **B** changes in the projected ocean mixed layer depth (MLD) by winter 2040-50. **C** and **D** - the same as above but for sea surface temperature (SST) and **E** and **F** for SST in summer (June-August); **G-I** are the same as above but for total atmospheric precipitation. NEMO-MEDUSA 1/4 degree high resolution model results using ssp370 CMIP6 scenario 2015-2099. High-resolution simulations are courtesy of Drs Andrew Coward, Andrew Yool, Katya Popova and Stephen Kelly, NOC.
